# Supplementary material for: How can we help family carers manage pain medicines for patients with advanced cancer? A systematic review of intervention studies
Source: PubMed Central journal article supplement — BMJ Support Palliat Care. 2016 May 5;6(3):263–75. doi: 10.1136/bmjspcare-2015-000958 (PMC5013162; doi:10.1136/bmjspcare-2015-000958), 2016-05-05
Supplement: bmjspcare-2015-000958-s1.pdf [file bmjspcare-2015-000958-s1.pdf]

## Appendix 1.1

### MEDLINE search strategy

Database: Ovid MEDLINE(R) 1946 to September 2014

- 1 intervention\*.mp. [mp=title, abstract, original title, name of substance word, subject heading word, keyword heading word, protocol supplementary concept word, rare disease supplementary concept word, unique identifier] (565880)
- 2 program\*.mp. [mp=title, abstract, original title, name of substance word, subject heading word, keyword heading word, protocol supplementary concept word, rare disease supplementary concept word, unique identifier] (653471)
- 3 pain management.mp. [mp=title, abstract, original title, name of substance word, subject heading word, keyword heading word, protocol supplementary concept word, rare disease supplementary concept word, unique identifier] (27497)
- 4 pain medicine.mp. [mp=title, abstract, original title, name of substance word, subject heading word, keyword heading word, protocol supplementary concept word, rare disease supplementary concept word, unique identifier] (574)
- 5 1 or 2 (1141011)
- 6 3 or 4 (27837)
- 7 (carer\* or caregiver\* or parent\* or famil\* or spous\* or couple\* or wife or wives or husband\* or mother\* or father\* or significant other).mp. [mp=title, abstract, original title, name of substance word, subject heading word, keyword heading word, protocol supplementary concept word, rare disease supplementary concept word, unique identifier] (1532744)
- 8 (cancer\* or tumor\* or tumour\* or neoplasm\* or malignancy).mp. [mp=title, abstract, original title, name of substance word, subject heading word, keyword heading word, protocol supplementary concept word, rare disease supplementary concept word, unique identifier] (2829024)
- 9 5 and 6 and 7 and 8 (198)
- 10 limit 9 to (english language and humans and yr="1902 - 2014") (186)
- 11 limit 10 to "all adult (19 plus years)" (77)
